# Supplementary material for: Synchronous detection of heavy metal ions in aqueous solution by gold nanoparticle surface-enhanced laser-induced breakdown spectroscopy
Source: Royal Society of Chemistry journal article supplement (doi:10.1039/d1ja00310k), 2021-01-01
Supplement: d1ja00310k1.pdf [file d1ja00310k1.pdf]

# Synchronous Detection of Multi-Heavy Metal ions in Aqueous Solution by Gold Nanoparticles Surface-Enhanced Laser-Induced Breakdown Spectroscopy

Yaqian Yao <sup>a, b</sup>, Fan He <sup>a, b</sup>, Qingyu Lin <sup>c</sup>, Yonghui Tian <sup>b, d</sup>, Tianlong Zhang <sup>d</sup>, Boping Xu <sup>e</sup>,  
XinYuan Qi <sup>a\*</sup>, Yixiang Duan <sup>b, d\*</sup>

<sup>a</sup> Department of Physics, Northwest University, Xi'an, Shaanxi, 710069, China

<sup>b</sup> Research Center of Analytical Instrumentation, Northwest University, 1 Xuefu Ave., Xi'an, Shaanxi, 710075, China.

<sup>c</sup> Research Center of Analytical Instrumentation, Sichuan University, Chengdu, 610064, China

<sup>d</sup> Key Laboratory of Synthetic and Natural Functional Molecule Chemistry of Ministry of Education, College of Chemistry & Materials Science, Northwest University, Xi'an, Shaanxi, 710069, China

<sup>e</sup> State Key Laboratory of Transient Optics and Photonics, Xi'an Institute of Optics and Precision Mechanics of CAS, Xi'an 710119, China

\*Email address: [qixycn@nwu.edu.cn](mailto:qixycn@nwu.edu.cn)

\*Email address: [yduan@nwu.edu.cn](mailto:yduan@nwu.edu.cn)

## Table of Contents

|                                                                                                                                       |         |
|---------------------------------------------------------------------------------------------------------------------------------------|---------|
| Fig S1 Full spectrum of silicon nitride .....                                                                                         | Page-S2 |
| Table S1 The average and the standard deviation of the emission line intensity for the three employed samples (Cu, Pb, and Cr). ..... | Page-S2 |
| The calculation process of AuNPs concentration and number .....                                                                       | Page-S2 |
| Table S2 Physical parameters of Cu (I), Pb (I), and Cr (I) lines. ....                                                                | Page-S4 |
| Table S3 Calculation of plasma temperature and electron density for Cu, Pb, and Cr. ....                                              | Page-S4 |

**Fig S1 Full spectrum of silicon nitride**

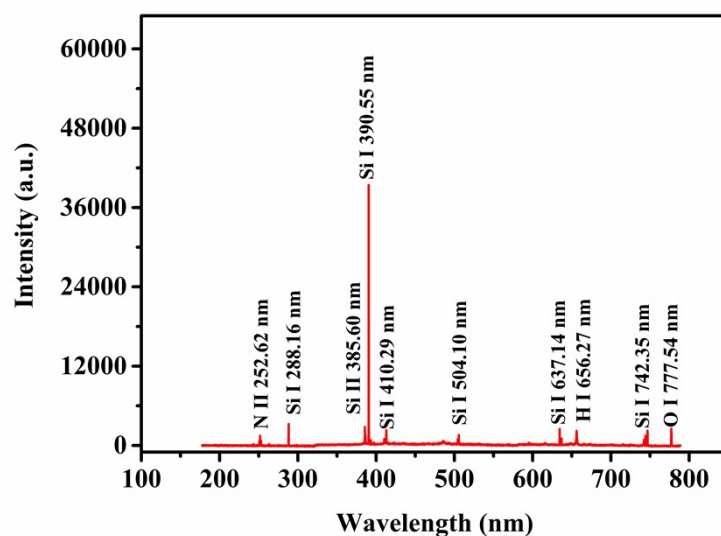

**Figure S1** Full spectrum of silicon nitride.

**Table S1** The average and the standard deviation of the emission line intensity for the three employed samples (Cu, Pb, and Cr).

**Table S1** The average and the standard deviation of the emission line intensity for the three employed samples (Cu, Pb, and Cr).

| Samples | Cu           | Pb           | Cr           |
|---------|--------------|--------------|--------------|
| M       | 1846 ± 205   | 963 ± 87     | 920 ± 150    |
| C-M     | 7345 ± 614   | 3509 ± 339   | 4948 ± 508   |
| 28 nm   | 12567 ± 758  | 15631 ± 1087 | 15921 ± 1811 |
| 18 nm   | 14105 ± 1178 | 18017 ± 1617 | 18284 ± 1353 |
| 13 nm   | 16494 ± 1216 | 21728 ± 1257 | 23799 ± 1976 |
| 11 nm   | 15175 ± 1843 | 16223 ± 542  | 20690 ± 1392 |

**The calculation process of AuNPs concentration and number**

The concentration of gold particles at 27.78 nm (the density of gold was 19.3 g/cm<sup>3</sup>): Mass of a gold particle with a diameter of 27.78 nm:  $m = \frac{4\rho\pi r^3}{3} = 2.217 \times 10^{-16}g$ ; The concentration of 1mL

HAuCl<sub>4</sub> solution with mass fraction of 1% was calculated to be about 0.024mol/L; Total mass of gold in 1mL HAuCl<sub>4</sub> solution:  $m_{Au}=0.024 \times 1.0 \times 10^{-3} \times 197=4.728 \times 10^{-3}g$ , The total volume is 50 mL; The approximate molality of AuNPs is  $M_{28nm}=m_{Au}/(m \times N_A \times V)=0.725 \text{ nmol/L}$  ( $N_A$  is Avogadro constant:  $6.02 \times 10^{23}$ ); By analogy, then: The approximate molality of AuNPs (17.88 nm):  $M_{28nm}=m_{Au}/(m \times N_A \times V)=2.72 \text{ nmol/L}$ ; AuNPs (12.78 nm):  $M_{28nm}=m_{Au}/(m \times N_A \times V)=7.54 \text{ nmol/L}$ ; AuNPs (11.11 nm):  $M_{28nm}=m_{Au}/(m \times N_A \times V)=11.30 \text{ nmol/L}$ ; The number of AuNPs on the surface unit is  $N = c \times v \times N_A / S = 7.72 \times 10^{10}$ ,  $2.90 \times 10^{11}$ ,  $8.03 \times 10^{11}$ , and  $1.20 \times 10^{12}$  (n°AuNPs/cm<sup>2</sup>), respectively.

**Table S2 Physical parameters of Cu (I), Pb (I), and Cr (I) lines.**

**Table S2 Physical parameters of Cu (I), Pb (I), and Cr (I) lines.**

| species | $\lambda$ (nm) | $g_m$ | $A_{mn} (*10^7s^{-1})$ | $E_m$ (cm <sup>-1</sup> ) |
|---------|----------------|-------|------------------------|---------------------------|
| Cu I    | 465.112        | 8     | 3.80                   | 62403.33                  |
| Cu I    | 510.554        | 4     | 0.20                   | 30783.70                  |
| Cu I    | 515.324        | 4     | 6.00                   | 49935.20                  |
| Cu I    | 521.820        | 6     | 7.50                   | 49942.05                  |
| Pb I    | 357.273        | 5     | 9.90                   | 49439.62                  |
| Pb I    | 363.959        | 3     | 3.40                   | 35287.22                  |
| Pb I    | 367.149        | 5     | 4.40                   | 48686.93                  |
| Pb I    | 368.346        | 1     | 13.70                  | 34959.91                  |
| Pb I    | 373.994        | 5     | 7.30                   | 48188.63                  |
| Pb I    | 401.963        | 7     | 0.35                   | 46328.67                  |
| Pb I    | 405.781        | 3     | 9.00                   | 35287.22                  |
| Pb I    | 416.803        | 2     | 0.12                   | 45443.17                  |
| Pb I    | 500.542        | 3     | 2.70                   | 49439.62                  |
| Cr I    | 357.870        | 9     | 14.80                  | 27935.24                  |
| Cr I    | 359.349        | 3     | 15.00                  | 27820.20                  |
| Cr I    | 360.533        | 5     | 13.10                  | 27728.81                  |
| Cr I    | 425.434        | 9     | 3.15                   | 23498.82                  |
| Cr I    | 427.480        | 7     | 3.06                   | 23386.34                  |
| Cr I    | 428.972        | 5     | 3.06                   | 23305.00                  |
| Cr I    | 520.451        | 3     | 5.08                   | 26801.90                  |

**Table S3 Calculation of plasma temperature and electron density for Cu, Pb, and Cr.**

| Element | AuNPs sizes (nm) | Plasma temperature<br>(10 <sup>3</sup> K) | Electron density<br>(10 <sup>16</sup> cm <sup>-3</sup> ) |
|---------|------------------|-------------------------------------------|----------------------------------------------------------|
| Cu      | 28               | 10.07 ± 0.38                              | 4.18 ± 0.27                                              |
| Cu      | 18               | 10.27 ± 0.21                              | 4.13 ± 0.26                                              |
| Cu      | 13               | 10.51 ± 0.11                              | 4.29 ± 0.27                                              |
| Cu      | 11               | 10.57 ± 0.15                              | 4.19 ± 0.27                                              |
| Pb      | 28               | 9.01 ± 0.21                               | 5.46 ± 0.13                                              |
| Pb      | 18               | 9.18 ± 0.19                               | 5.28 ± 0.12                                              |
| Pb      | 13               | 10.37 ± 0.12                              | 5.37 ± 0.13                                              |
| Pb      | 11               | 10.37 ± 0.12                              | 5.42 ± 0.12                                              |

---

|    |    |                 |                 |
|----|----|-----------------|-----------------|
| Cr | 28 | $4.27 \pm 0.27$ | $7.57 \pm 0.12$ |
| Cr | 18 | $4.65 \pm 0.19$ | $7.28 \pm 0.12$ |
| Cr | 13 | $4.28 \pm 0.19$ | $7.55 \pm 0.11$ |
| Cr | 11 | $4.56 \pm 0.26$ | $7.60 \pm 0.12$ |

---
